# Supplementary material for: Polyphony of domestic dog whines and vocal cues to body size
Source: Oxford University Press journal article supplement (doi:10.1093/cz/zoaa042), 2020-08-13
Supplement: zoaa042_supplementary_data.zip [file zoaa042_supplementary_data.zip]

**Table S4.** Mean  $\pm$  *SD* and min-max values for measured acoustic variables in different categories of whines of domestic dogs. Designations: f-whine – the whine with the low fundamental frequency f0 alone, g-whine – the whine with the high fundamental frequency g0 alone, f&g-whine – the whine with both f0&g0, h-whine – any whine containing the ultra-high (h0) fundamental frequency. For decoding the abbreviations of measured acoustic variables, see Table 2.

| Dog ID | f-whine   |           |           | g-whine   |            |           | f&g-whine |           |           |           |           |            | h-whine    |           |           |             |             |
|--------|-----------|-----------|-----------|-----------|------------|-----------|-----------|-----------|-----------|-----------|-----------|------------|------------|-----------|-----------|-------------|-------------|
|        | f-dur     | f0max     | f0min     | g-dur     | g0max      | g0min     | call-dur  | f-dur     | f0max     | f0min     | g-dur     | g0max      | g0min      | call-dur  | h-dur     | h0max       | h0min       |
|        | (ms)      | (kHz)     | (kHz)     | (ms)      | (kHz)      | (kHz)     | (ms)      | (ms)      | (kHz)     | (kHz)     | (ms)      | (kHz)      | (kHz)      | (ms)      | (ms)      | (kHz)       | (kHz)       |
| 1      | 0.15±0.05 | 1.16±0.31 | 0.82±0.30 | 0.37±0.22 | 10.43±0.30 | 9.46±0.32 | 0.55±0.33 | 0.46±0.33 | 2.13±0.85 | 1.49±0.60 | 0.33±0.28 | 10.46±0.52 | 9.51±0.40  |           |           |             |             |
|        | 0.07-0.24 | 0.77-1.89 | 0.53-1.63 | 0.09-0.81 | 9.73-10.98 | 8.97-9.90 | 0.15-1.19 | 0.09-1.19 | 0.90-3.42 | 0.68-2.36 | 0.15-1.19 | 9.68-11.00 | 8.82-10.14 |           |           |             |             |
| 2      | 0.21±0.12 | 1.12±0.26 | 0.58±0.16 | 0.22±0.31 | 7.62±1.57  | 5.69±0.42 | 0.20±0.17 | 0.11±0.07 | 1.49±0.20 | 0.81±0.21 | 0.15±0.11 | 6.86±1.13  | 5.60±0.23  |           |           |             |             |
|        | 0.07-0.51 | 0.68-1.55 | 0.30-0.83 | 0.09-1.18 | 5.66-10.59 | 4.80-6.63 | 0.09-0.69 | 0.04-0.26 | 1.22-1.78 | 0.40-1.16 | 0.05-0.46 | 5.72-9.04  | 5.31-6.13  |           |           |             |             |
| 3      | 0.61±0.52 | 0.60±0.16 | 0.30±0.10 | 0.57±0.25 | 6.67±0.30  | 5.48±0.29 | 0.70±0.22 | 0.43±0.19 | 1.04±0.21 | 0.63±0.26 | 0.65±0.29 | 6.67±0.48  | 5.50±0.30  |           |           |             |             |
|        | 0.21-1.66 | 0.49-1.01 | 0.17-0.51 | 0.21-0.98 | 6.30-7.29  | 5.06-5.83 | 0.34-1.01 | 0.12-0.74 | 0.60-1.27 | 0.15-0.99 | 0.16-1.01 | 5.68-7.25  | 4.97-5.96  |           |           |             |             |
| 4      | 0.11±0.06 | 0.66±0.07 | 0.41±0.05 | 0.16±0.06 | 5.54±0.67  | 4.57±0.27 | 0.16±0.04 | 0.09±0.02 | 0.85±0.08 | 0.51±0.06 | 0.13±0.06 | 5.79±0.38  | 4.90±0.29  |           |           |             |             |
|        | 0.06-0.28 | 0.55-0.73 | 0.32-0.51 | 0.08-0.27 | 4.75-6.80  | 4.26-5.34 | 0.10-0.21 | 0.06-0.12 | 0.71-1.01 | 0.43-0.64 | 0.05-0.21 | 5.23-6.50  | 4.56-5.34  |           |           |             |             |
| 5      | 0.35±0.22 | 0.72±0.07 | 0.48±0.11 | 0.61±0.47 | 4.56±0.35  | 3.82±0.25 | 0.60±0.47 | 0.43±0.36 | 0.82±0.09 | 0.49±0.09 | 0.50±0.44 | 4.73±0.31  | 3.85±0.24  |           |           |             |             |
|        | 0.14-0.58 | 0.62-0.77 | 0.34-0.60 | 0.18-1.52 | 3.96-5.08  | 3.53-4.30 | 0.26-1.82 | 0.11-1.14 | 0.68-1.01 | 0.38-0.71 | 0.21-1.83 | 4.22-5.16  | 3.57-4.30  |           |           |             |             |
| 6      | 0.72±0.27 | 0.63±0.16 | 0.24±0.04 | 0.64±0.27 | 3.59±0.20  | 2.95±0.25 | 1.17±0.65 | 0.75±0.66 | 0.80±0.13 | 0.43±0.15 | 0.76±0.42 | 3.43±0.19  | 3.01±0.25  |           |           |             |             |
|        | 0.29-1.16 | 0.38-0.88 | 0.17-0.32 | 0.29-1.20 | 3.27-4.02  | 2.54-3.46 | 0.48-2.82 | 0.22-2.55 | 0.53-0.94 | 0.25-0.73 | 0.21-1.54 | 3.22-3.85  | 2.58-3.50  |           |           |             |             |
| 7      | 0.56±0.13 | 1.06±0.17 | 0.70±0.17 | 0.26±0.09 | 9.90±0.47  | 8.78±0.34 | 0.65±0.61 | 0.46±0.51 | 1.27±0.26 | 0.85±0.17 | 0.21±0.18 | 9.64±0.55  | 8.86±0.49  | 0.85±0.49 | 0.25±0.23 | 23.26±0.98  | 22.16±0.66  |
|        | 0.38-0.81 | 0.90-1.44 | 0.38-0.94 | 0.13-0.50 | 9.04-10.61 | 8.20-9.38 | 0.24-2.43 | 0.15-2.04 | 0.96-1.67 | 0.60-1.27 | 0.05-0.67 | 8.85-10.48 | 8.16-9.71  | 0.22-1.89 | 0.06-0.95 | 21.37-24.84 | 20.71-23.06 |
| 8      | 0.90±0.35 | 1.17±0.18 | 0.65±0.13 | 0.65±0.32 | 6.27±0.54  | 5.42±0.41 | 0.86±0.28 | 0.41±0.15 | 1.41±0.13 | 1.12±0.27 | 0.63±0.37 | 6.58±0.39  | 5.21±0.09  | 0.85±0.30 | 0.21±0.12 | 22.08±0.84  | 20.46±0.99  |
|        | 0.49-1.29 | 0.96-1.39 | 0.51-0.86 | 0.10-1.24 | 5.38-7.21  | 5.06-6.26 | 0.51-1.16 | 0.21-0.57 | 1.27-1.59 | 0.75-1.39 | 0.35-1.16 | 6.00-6.84  | 5.10-5.31  | 0.29-1.16 | 0.08-0.45 | 20.34-23.30 | 18.66-21.66 |
| 9      | 1.22±0.87 | 0.63±0.25 | 0.43±0.12 | 1.63±0.75 | 6.32±0.80  | 4.64±0.39 | 1.31±0.75 | 0.59±0.67 | 0.76±0.20 | 0.46±0.11 | 0.85±0.71 | 5.59±0.73  | 4.41±0.35  |           |           |             |             |
|        | 0.53-2.49 | 0.38-0.86 | 0.32-0.56 | 0.71-3.07 | 5.39-8.25  | 4.07-5.25 | 0.21-2.84 | 0.09-2.67 | 0.43-1.07 | 0.21-0.79 | 0.14-2.51 | 4.45-7.12  | 4.02-5.43  |           |           |             |             |
| 10     | 0.77±0.43 | 0.74±0.09 | 0.37±0.16 | 0.46±0.28 | 6.07±0.85  | 5.45±0.69 | 0.61±0.41 | 0.45±0.41 | 1.04±0.22 | 0.55±0.20 | 0.21±0.18 | 5.76±0.57  | 5.04±0.51  | 1.15±0.61 | 0.79±0.60 | 16.54±0.58  | 14.08±0.88  |
|        | 0.16-1.57 | 0.58-0.88 | 0.12-0.60 | 0.11-0.97 | 4.54-7.12  | 3.89-6.35 | 0.18-1.34 | 0.12-1.22 | 0.73-1.39 | 0.30-0.96 | 0.06-0.71 | 4.90-6.82  | 4.50-5.77  | 0.53-2.84 | 0.31-2.44 | 15.42-17.63 | 12.51-15.19 |
| 11     | 0.64±0.24 | 0.78±0.08 | 0.43±0.10 | 0.69±0.26 | 8.97±0.50  | 7.64±0.70 | 0.73±0.24 | 0.43±0.20 | 1.11±0.18 | 0.66±0.20 | 0.57±0.27 | 8.96±0.57  | 7.50±0.70  | 1.05±0.37 | 0.49±0.24 | 14.59±0.73  | 13.90±0.83  |
|        | 0.28-1.26 | 0.58-0.90 | 0.27-0.64 | 0.38-1.41 | 8.26-10.07 | 6.35-8.85 | 0.42-1.18 | 0.25-0.91 | 0.86-1.39 | 0.27-1.14 | 0.10-1.18 | 7.77-9.86  | 6.18-8.67  | 0.56-1.82 | 0.13-1.07 | 13.88-16.83 | 13.13-16.41 |
| 12     | 0.31±0.19 | 1.02±0.30 | 0.68±0.26 | 0.14±0.08 | 7.49±1.05  | 6.73±0.76 | 0.23±0.17 | 0.22±0.15 | 1.30±0.38 | 0.85±0.41 | 0.11±0.05 | 7.14±0.58  | 6.50±0.76  |           |           |             |             |
|        | 0.11-0.74 | 0.61-1.61 | 0.25-1.24 | 0.04-0.31 | 6.30-9.34  | 5.68-8.24 | 0.10-0.52 | 0.10-0.48 | 0.66-1.67 | 0.38-1.48 | 0.04-0.15 | 6.56-7.81  | 5.76-7.66  |           |           |             |             |
| 13     | 0.41±0.25 | 0.86±0.23 | 0.56±0.13 | 1.02±0.27 | 9.76±0.74  | 8.21±1.03 | 0.81±0.40 | 0.35±0.26 | 1.24±0.29 | 0.82±0.25 | 0.54±0.46 | 8.59±0.85  | 6.85±0.59  | 0.97±0.29 | 0.31±0.19 | 16.97±0.45  | 16.35±0.56  |
|        | 0.11-0.87 | 0.55-1.31 | 0.38-0.81 | 0.60-1.34 | 7.88-10.59 | 5.85-9.77 | 0.45-1.58 | 0.08-0.85 | 0.71-1.68 | 0.62-1.40 | 0.05-1.58 | 7.68-10.22 | 5.98-7.64  | 0.50-1.29 | 0.10-0.74 | 16.35-17.91 | 15.60-17.63 |
| 14     | 0.97±0.67 | 0.68±0.12 | 0.47±0.11 | 0.77±0.45 | 6.24±0.53  | 5.56±0.32 | 1.04±0.39 | 0.53±0.36 | 0.86±0.11 | 0.73±0.11 | 0.78±0.31 | 6.37±0.67  | 5.35±0.63  | 1.04±0.81 | 0.23±0.32 | 14.43±0.98  | 13.57±1.43  |
|        | 0.08-2.47 | 0.46-0.86 | 0.30-0.70 | 0.10-2.41 | 5.20-7.42  | 4.89-6.07 | 0.39-1.77 | 0.15-1.22 | 0.67-1.10 | 0.53-0.91 | 0.25-1.19 | 5.25-7.34  | 3.78-6.09  | 0.27-2.91 | 0.04-1.08 | 12.46-15.66 | 11.15-15.42 |
| 15     | 1.70±0.78 | 0.75±0.14 | 0.40±0.07 | 0.59±0.18 | 4.35±0.18  | 3.67±0.35 | 1.13±0.34 | 0.67±0.28 | 1.00±0.23 | 0.63±0.15 | 0.75±0.45 | 4.34±0.14  | 3.65±0.38  | 0.95±0.54 | 0.71±0.55 | 13.40±0.34  | 11.59±0.61  |
|        | 0.90-2.95 | 0.53-0.99 | 0.30-0.51 | 0.33-0.85 | 4.09-4.73  | 2.97-4.19 | 0.46-1.59 | 0.35-1.22 | 0.58-1.42 | 0.36-0.88 | 0.17-1.57 | 4.13-4.62  | 3.05-4.30  | 0.26-1.90 | 0.07-1.82 | 12.61-13.82 | 9.98-12.33  |
| 16     | 0.34±0.16 | 0.61±0.17 | 0.25±0.09 | 0.29±0.06 | 4.49±0.24  | 3.83±0.15 | 0.38±0.08 | 0.26±0.10 | 0.75±0.16 | 0.38±0.11 | 0.21±0.14 | 4.39±0.22  | 4.11±0.18  |           |           |             |             |
|        | 0.10-0.63 | 0.36-0.83 | 0.12-0.38 | 0.19-0.39 | 4.13-4.84  | 3.59-4.09 | 0.24-0.53 | 0.08-0.38 | 0.51-1.09 | 0.21-0.64 | 0.05-0.51 | 4.06-4.73  | 3.85-4.39  |           |           |             |             |
| 17     | 0.68±0.39 | 0.73±0.27 | 0.37±0.10 | 0.62±0.37 | 4.69±0.22  | 4.14±0.32 | 0.96±0.23 | 0.67±0.24 | 1.16±0.31 | 0.88±0.30 | 0.89±0.24 | 4.79±0.35  | 3.97±0.33  |           |           |             |             |
|        | 0.26-1.57 | 0.40-1.09 | 0.25-0.60 | 0.25-1.47 | 4.43-5.06  | 3.78-4.56 | 0.53-1.30 | 0.40-1.19 | 0.71-1.52 | 0.30-1.31 | 0.53-1.27 | 4.06-5.34  | 3.38-4.60  |           |           |             |             |
| 18     | 0.37±0.19 | 0.59±0.10 | 0.31±0.03 | 0.12±0.05 | 4.18±0.31  | 3.66±0.24 | 0.45±0.26 | 0.33±0.25 | 0.79±0.18 | 0.43±0.09 | 0.21±0.19 | 4.43±0.41  | 3.78±0.27  | 0.40±0.33 | 0.05±0.05 | 11.08±0.70  | 9.99±0.73   |
|        | 0.15-0.76 | 0.45-0.77 | 0.25-0.36 | 0.04-0.25 | 3.74-4.71  | 3.25-4.11 | 0.15-1.19 | 0.06-1.07 | 0.45-1.14 | 0.32-0.62 | 0.04-0.74 | 3.89-5.21  | 3.42-4.26  | 0.10-1.03 | 0.03-0.18 | 9.65-11.71  | 9.00-11.01  |
| 19     | 0.53±0.23 | 0.68±0.16 | 0.30±0.09 | 0.39±0.18 | 5.61±0.33  | 4.03±0.24 | 0.42±0.11 | 0.35±0.13 | 0.87±0.11 | 0.50±0.09 | 0.34±0.14 | 5.24±0.51  | 4.39±0.28  |           |           |             |             |
|        | 0.18-0.86 | 0.47-1.03 | 0.19-0.45 | 0.27-0.66 | 5.29-6.05  | 3.87-4.39 | 0.30-0.63 | 0.18-0.63 | 0.68-1.07 | 0.38-0.68 | 0.08-0.53 | 4.54-6.13  | 4.13-5.10  |           |           |             |             |
| 20     | 0.21±0.07 | 0.83±0.26 | 0.47±0.16 | 0.19±0.20 | 3.59±0.21  | 3.28±0.24 | 0.17±0.06 | 0.10±0.05 | 0.74±0.21 | 0.52±0.14 | 0.16±0.06 | 3.69±0.09  | 3.21±0.12  |           |           |             |             |
|        | 0.12-0.33 | 0.43-1.14 | 0.23-0.83 | 0.08-0.83 | 3.03-3.87  | 2.58-3.53 | 0.13-0.29 | 0.06-0.22 | 0.34-0.99 | 0.21-0.71 | 0.11-0.29 | 3.48-3.78  | 3.01-3.46  |           |           |             |             |
| mean   | 0.59±0.39 | 0.80±0.20 | 0.46±0.16 | 0.52±0.36 | 6.32±2.12  | 5.35±1.90 | 0.66±0.35 | 0.41±0.19 | 1.07±0.34 | 0.69±0.27 | 0.45±0.27 | 6.17±1.98  | 5.26±1.79  | 0.91±0.23 | 0.38±0.26 | 16.54±4.21  | 15.26±4.19  |
|        | 0.11-1.70 | 0.59-1.17 | 0.24-0.82 | 0.12-1.63 | 3.59-10.43 | 2.95-9.46 | 0.16-1.31 | 0.09-0.75 | 0.74-2.13 | 0.38-1.49 | 0.11-0.90 | 3.43-10.46 | 3.01-9.51  | 0.40-1.15 | 0.05-0.79 | 11.08-23.26 | 9.99-22.16  |
